# Supplementary material for: Validity of the Onsager–Glarum relationship in a molecular coulomb fluid: investigation via temperature-dependent molecular dynamics simulations of a representative ionic liquid, [BMIM][PF6]
Source: Royal Society of Chemistry journal article supplement (doi:10.1039/d3nj01996a), 2023-01-01
Supplement: d3nj01996a1.pdf [file d3nj01996a1.pdf]

## Supplementary data

### **Validity of the Onsager-Glarum Relation in a Molecular Coulomb Fluid: Investigation via Temperature-dependent Molecular Dynamics Simulations of a Representative Ionic Liquid, [BMIM][PF<sub>6</sub>]**

Tamisra Pal<sup>#</sup>, Suman Das<sup>#</sup>, Dhruvajyoti Maji and Ranjit Biswas\*

Department of Chemical, Biological and Macromolecular Sciences, S. N. Bose National Centre for Basic Sciences, JD Block, Sector III, Salt Lake, Kolkata 700106, India

---

<sup>#</sup>Contributed equally to this work

\*Corresponding Author: Ranjit Biswas, Email: ranjit@bose.res.in; FAX: 91 33 2335 3477

**Table S1** Force field parameters of [BMIM]<sup>+</sup> and [PF<sub>6</sub>]<sup>-</sup> are given below:

Lennard-Jones Parameters for different atoms of [BMIM]<sup>+</sup> and [PF<sub>6</sub>]<sup>-</sup>

| Atom                                   | $\epsilon_{ij}$ (kJ/mol) | $\sigma_{ij}$ (Å) |
|----------------------------------------|--------------------------|-------------------|
| CR                                     | 0.292                    | 3.55              |
| NA (NAA, NAM)                          | 0.711                    | 3.25              |
| CW (CWA, CWM)                          | 0.292                    | 3.55              |
| H4(H4A, H4M)                           | 0.125                    | 1.72              |
| H5                                     | 0.125                    | 1.72              |
| CT (CTM, CT1, CT2, CT3, CT4)           | 0.276                    | 3.50              |
| H1 (H1M, H2M, H3M, H11, H12)           | 0.125                    | 1.92              |
| HC (H21, H22, H31, H32, H41, H42, H43) | 0.125                    | 2.50              |
| P                                      | 0.836                    | 3.94              |
| F                                      | 0.255                    | 3.118             |

Partial charges on each atom of [BMIM]<sup>+</sup> and [PF<sub>6</sub>]<sup>-</sup>

| Atom                                      | $q_i(e)$ |
|-------------------------------------------|----------|
| CR                                        | 0.060    |
| NA (NAA, NAM)                             | 0.052    |
| CW (CWA, CWM)                             | -0.020   |
| H4(H4A, H4M)                              | 0.096    |
| H5                                        | 0.096    |
| CTM, CT1                                  | -0.089   |
| CT2, CT3                                  | -0.038   |
| CT4                                       | -0.065   |
| H1 (H1M, H2M, H3M, H11,<br>H12)           | 0.105    |
| HC (H21, H22, H31, H32,<br>H41, H42, H43) | 0.026    |
| P                                         | 0.580    |
| F                                         | -0.230   |

Bond lengths and bond force constants for [BMIM]<sup>+</sup> and [PF<sub>6</sub>]<sup>-</sup>

| Bonds       | $r_0$ (Å) | $K_b$ (kJmol <sup>-1</sup> Å <sup>2</sup> ) |
|-------------|-----------|---------------------------------------------|
| CR/CW-H5/H4 | 1.08      | Constrained                                 |
| CT-H1/HC    | 1.09      | Constrained                                 |
| CR-NA       | 1.315     | 1996                                        |
| CW-NA       | 1.378     | 1787                                        |
| CW-CW       | 1.341     | 2176                                        |
| NA-CTM/CT1  | 1.466     | 1410                                        |
| CT-CT       | 1.529     | 1121                                        |
| P-F         | 1.6       | 1673                                        |

Angles and corresponding angle force constants for [BMIM]<sup>+</sup> and [PF<sub>6</sub>]<sup>-</sup>

| Angles         | $\theta_0$ (deg) | $K_\theta$ (kJmol <sup>-1</sup> rad <sup>2</sup> ) |
|----------------|------------------|----------------------------------------------------|
| CW-NA-CR       | 108.0            | 292.6                                              |
| CW-NA-CTM/CT1  | 125.6            | 292.6                                              |
| CR-NA-CTM/CT1  | 126.4            | 292.6                                              |
| NA-CR-H4/H5    | 125.1            | 146.3                                              |
| NA-CR-NA       | 109.8            | 292.6                                              |
| NA-CW-CW       | 107.1            | 292.6                                              |
| NA-CW-H5/H4    | 122.0            | 146.3                                              |
| CW-CW-H4/H5    | 130.9            | 146.3                                              |
| NA/CT-CT-H1/HC | 110.7            | 156.6                                              |
| NA/CT-CT-CT    | 112.7            | 418.4                                              |
| H1/HC-CT-H1/HC | 107.8            | 138.1                                              |
| F-P-F          | 90.0             | 836.8                                              |

Coefficient of Fourier series of various dihedrals for [BMIM]<sup>+</sup>

| Dihedrals                  | $V_1$ (kJ/mol) | $V_2$ (kJ/mol) | $V_3$ (kJ/mol) |
|----------------------------|----------------|----------------|----------------|
| X <sup>a</sup> -NA-CR-X    | 0              | 19.46          | 0              |
| X-CW-CW-X                  | 0              | 44.98          | 0              |
| X-NA-CW-X                  | 0              | 12.55          | 0              |
| CW-NA-CTM/CT1-H1           | 0              | 0              | 0.519          |
| CR-NA-CTM/CT1-H1           | 0              | 0              | 0              |
| CW-NA-CTM/CT1-C2           | -7.154         | 4.43           | 0.877          |
| CR-NA-CTM/CT1-C2           | -5.269         | 0              | 0              |
| NA-CTM/CT1-CT2-<br>CT3/CT4 | -7.480         | -0.681         | 1.02           |
| NA-CTM/CT1-CT2-<br>HC      | 0              | 0              | 0              |
| CT-CT-CT-H1/HC             | 0              | 0              | 1.531          |
| H1/HC-CT-CT-H1/HC          | 0              | 0              | 1.331          |
| CT-CT-CT-CT                | 7.28           | -0.657         | 1.167          |
| X-NA-X-X                   | 0              | 8.37           | 0              |
| X-CR/CW-X-X                | 0              | 9.2            | 0              |

<sup>a</sup>X represents improper dihedral

The force field parameters of [BMIM]<sup>+</sup> is adopted from the following paper: J. N. Canongia Lopes, J. Deschamps, and A. A. H. Padua, *J. Phys. Chem. B* **108**, 2038 (2004). Several modifications of the force field parameters, performed by J. N. Canongia Lopes, J. Deschamps, and A. A. H. Padua, *J. Phys. Chem. B* **108**, 11250 (2004) has also been considered. The force field parameters of [PF<sub>6</sub>]<sup>-</sup> is taken from: O. Borodin, G. D. Smith, and R. L. Jaffe, *J. Comput. Chem.* **22**, 641 (2001). The total charge of both the cation and anion as well as some of the Lennard-Jones parameters is modified following the work of B. L. Bhargava and S. Balasubramanian, *J. Chem. Phys.* **127**, 114510 (2007).

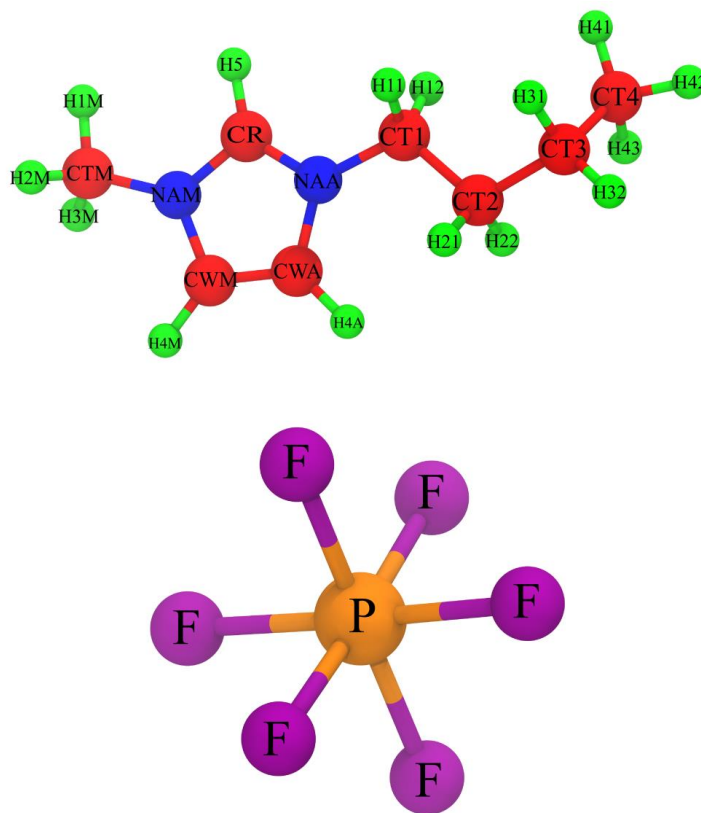

**Fig. S1.** Representations of [BMIM]<sup>+</sup> and [PF<sub>6</sub>]<sup>-</sup> in our simulations with various atom types.

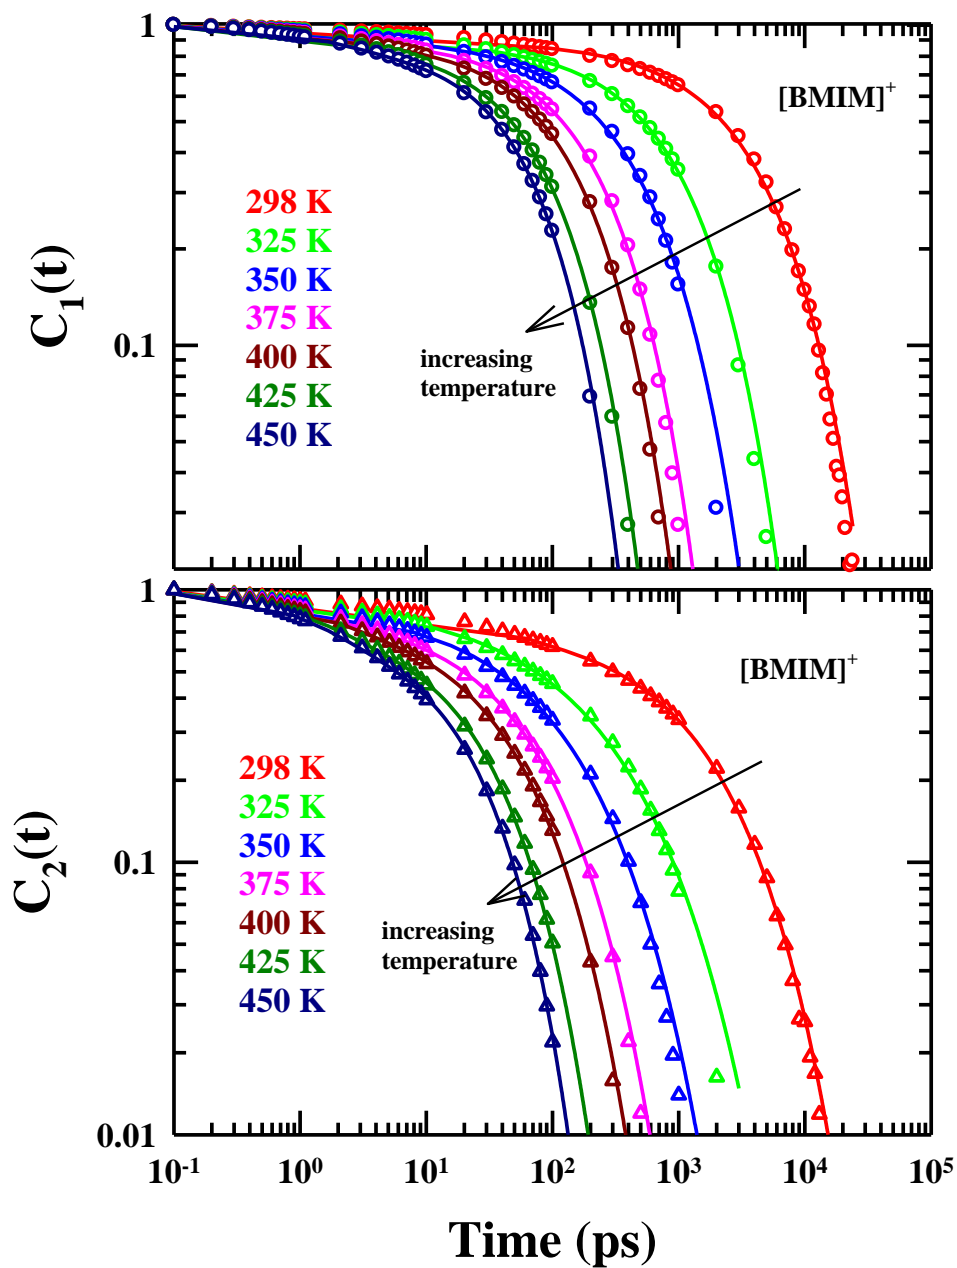

**Fig. S2.** Reorientational correlation function,  $C_l(t)$  of  $[\text{BMIM}]^+$  cation for all the temperatures. The upper panel shows the data for rank 1 ( $l = 1$ ), and the lower panel for rank 2 ( $l = 2$ ). The simulated data for each temperature is shown by markers and the continuous lines represent the stretched exponential fitting. The fitting parameters are shown in Table S2.



Table S2 Stretched-exponential fitting parameters for reorientational correlation functions,  $C_1(t)$  and  $C_2(t)$  of [BMIM]<sup>+</sup> at various temperatures

| Temperature (K) |          | $a_1$ | $\tau_1$ (ps) | $a_2$ | $\tau_2$ (ps) | $a_3$ | $\tau_3$ (ps) | $\beta$ | $\langle\tau\rangle^*$ ps) |
|-----------------|----------|-------|---------------|-------|---------------|-------|---------------|---------|----------------------------|
| 298             | $C_1(t)$ | 0.1   | 8.7           | 0.9   | 4565.0        | -     | -             | 0.75    | 4892.0                     |
|                 | $C_2(t)$ | 0.11  | 0.9           | 0.15  | 29.0          | 0.74  | 1390.0        | 0.61    | 1520.0                     |
| 325             | $C_1(t)$ | 0.1   | 5.7           | 0.9   | 1078.0        | -     | -             | 0.77    | 1132.0                     |
|                 | $C_2(t)$ | 0.09  | 1.3           | 0.91  | 196.0         | -     | -             | 0.52    | 332.0                      |
| 350             | $C_1(t)$ | 0.08  | 2.5           | 0.92  | 479.0         | -     | -             | 0.73    | 537.0                      |
|                 | $C_2(t)$ | 0.12  | 1.4           | 0.88  | 101.0         | -     | -             | 0.57    | 143.0                      |
| 375             | $C_1(t)$ | 0.09  | 2.0           | 0.91  | 233.0         | -     | -             | 0.78    | 245.0                      |
|                 | $C_2(t)$ | 0.15  | 1.4           | 0.85  | 54.9          | -     | -             | 0.63    | 66.3                       |
| 400             | $C_1(t)$ | 0.09  | 1.9           | 0.91  | 158.0         | -     | -             | 0.79    | 165.0                      |
|                 | $C_2(t)$ | 0.17  | 1.4           | 0.83  | 37.6          | -     | -             | 0.64    | 43.6                       |
| 425             | $C_1(t)$ | 0.11  | 1.8           | 0.89  | 93.1          | -     | -             | 0.82    | 92.5                       |
|                 | $C_2(t)$ | 0.21  | 1.4           | 0.79  | 23.7          | -     | -             | 0.70    | 24.0                       |
| 450             | $C_1(t)$ | 0.13  | 1.8           | 0.87  | 70.2          | -     | -             | 0.85    | 66.7                       |
|                 | $C_2(t)$ | 0.25  | 1.3           | 0.75  | 19.0          | -     | -             | 0.75    | 17.3                       |

\* $\langle\tau\rangle = a_1 \times \tau_1 + a_2 \times \tau_2 + a_3 \times \left(\frac{\tau_3}{\beta}\right) \times \Gamma\left(\frac{1}{\beta}\right)$  for  $C_2(t)$  at 298 K otherwise  $\langle\tau\rangle = a_1 \times \tau_1 + a_2 \times \left(\frac{\tau_2}{\beta}\right) \times \Gamma\left(\frac{1}{\beta}\right)$

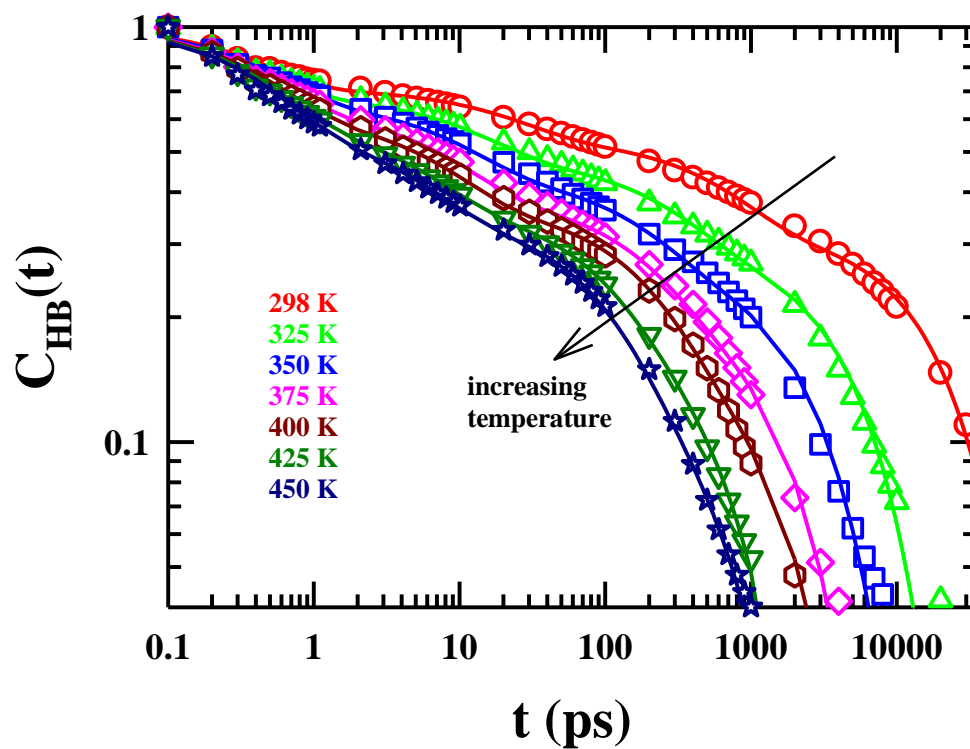

**Fig. S3.** Structural hydrogen bond correlation function,  $C_{HB}(t)$  across all the temperatures with multi-exponential fittings. Simulated values are shown using different markers at every temperature and continuous lines represent corresponding fittings. The fitting parameters are shown in Table 4 of the main text.
